# Supplementary material
Source: Elsevier journal article supplement (https://sridharanlab.discovery.wisc.edu/wp-content/uploads/2016/11/mmc2.xlsx)
Supplement: mmc2 [file mmc2.xlsx]

## Sheet: Sheet1
Supplementary table 1
Primary data and percentages of colonies associated with Figure 1
	N+= Nanog , E+= E-cadherin
Figure 1Ci			RepA	RepB	RepC		RepA	RepB	RepC	T-test
	d4	N+	0	4	0
		E+	0	6	0
		N+E+	0	4	0	% of N+	NA	100	NA	N+, N+E+	NA
		N-E+	0	2	0	% of E+	NA	33.3333	NA	E+, N-E+	0.42265
		N+E-	0	0	0	% of N+	NA	0	NA	N+E+, N+E-	0.42265
	d6	N+	54	72	11
		E+	0	4	7
		N+E+	0	2	5	% of N+	0	2.77778	45.4545	N+, N+E+	0.152982
		N-E+	0	2	2	% of E+	NA	50	28.5714	E+, N-E+	0.249521
		N+E-	54	70	6	% of N+	100	97.2222	54.5455	N+E+, N+E-	0.182232
	d8	N+	182	216	65
		E+	150	40	15
		N+E+	92	30	14	% of N+	50.5495	13.8889	21.5385	N+, N+E+	0.101969
		N-E+	58	10	1	% of E+	38.6667	25	6.66667	E+, N-E+	0.37152
		N+E-	90	186	51	% of N+	49.4505	86.1111	78.4615	N+E+, N+E-	0.312251
	d10	N+	376	346	187
		E+	404	366	90
		N+E+	238	220	112	% of N+	63.2979	63.5838	59.893	N+, N+E+	0.184818
		N-E+	166	146	-22	% of E+	41.0891	39.8907	-24.4444	E+, N-E+	0.175353
		N+E-	138	126	75	% of N+	36.7021	36.4162	40.107	N+E+, N+E-	0.0617428
Figure 1Cii			RepA	RepB	RepC		RepA	RepB	RepC		T-test
	d4	N+	0	2	3
		E+	0	6	8
		N+E+	0	1	1	% of N+	NA	50	33.3333	N+, N+E+	0.225403
		N-E+	0	5	7	% of E+	NA	83.3333	87.5	E+, N-E+	0.183503
		N+E-	0	1	2	% of N+	NA	50	66.6667	N+E+, N+E-	0.42265
	d6	N+	84	112	94
		E+	138	220	240
		N+E+	58	58	30	% of N+	69.0476	51.7857	31.9149	N+, N+E+	0.0518104
		N-E+	80	162	210	% of E+	57.971	73.6364	87.5	E+, N-E+	0.0348676
		N+E-	26	54	64	% of N+	30.9524	48.2143	68.0851	N+E+, N+E-	0.975359
	d8	N+	456	428	498
		E+	150	264	82
		N+E+	110	186	68	% of N+	24.1228	43.4579	13.6546	N+, N+E+	0.00106638
		N-E+	40	78	14	% of E+	26.6667	29.5455	17.0732	E+, N-E+	0.0972256
		N+E-	346	242	430	% of N+	75.8772	56.5421	86.3454	N+E+, N+E-	0.133473
	d10	N+	312	604	516
		E+	164	416	272
		N+E+	106	262	204	% of N+	33.9744	43.3775	39.5349	N+, N+E+	0.0426778
		N-E+	58	154	68	% of E+	35.3659	37.0192	25	E+, N-E+	0.0735133
		N+E-	206	342	312	% of N+	66.0256	56.6225	60.4651	N+E+, N+E-	0.0074393
Figure 1Ciii							RepA	RepB	RepC		T-test
	d4	N+	0	14	32
		E+	10	126	242
		N+E+	0	14	26	% of N+	NA	100	81.25	N+, N+E+	0.42265
		N-E+	10	112	216	% of E+	100	88.8889	89.2562	E+, N-E+	0.217938
		N+E-	0	0	6	% of N+	NA	0	18.75	N+E+, N+E-	0.195928
	d6	N+	116	826	698
		E+	590	1630	1300
		N+E+	108	790	666	% of N+	93.1034	95.6416	95.4155	N+, N+E+	0.101331
		N-E+	482	840	634	% of E+	81.6949	51.5337	48.7692	E+, N-E+	0.130837
		N+E-	8	36	32	% of N+	6.89655	4.35835	4.58453	N+E+, N+E-	0.13239
	d8	N+	676	1010	1552
		E+	1230	1328	2422
		N+E+	674	976	1504	% of N+	99.7041	96.6337	96.9072	N+, N+E+	0.940437
		N-E+	556	352	918	% of E+	45.2033	26.506	37.9026	E+, N-E+	0.0650033
		N+E-	2	34	48	% of N+	0.295858	3.36634	3.09278	N+E+, N+E-	0.046963
	d10	N+	882	774	1224
		E+	1220	1270	1890
		N+E+	882	738	1208	% of N+	100	95.3488	98.6928	N+, N+E+	0.933179
		N-E+	338	532	682	% of E+	27.7049	41.8898	36.0847	E+, N-E+	0.0165227
		N+E-	0	36	16	% of N+	0	4.65116	1.30719	N+E+, N+E-	0.0230908
	N+= Nanog , S+=SSEA1+
Figure 1Di							RepA	RepB	RepC		T-test
	d4	N+	0	0	0
		S+	0	0	0
		N+S+	0	0	0	% of N+	NA	NA	NA	N+, N+S+	NA
		N-S+	0	0	0	% of S+	NA	NA	NA	S+, N-S+	NA
		N+S-	0	0	0	% of N+	NA	NA	NA	N+S+, N+S-	NA
	d6	N+	62	33	42
		S+	8	17	19
		N+S+	8	3	6	% of N+	12.9032	9.09091	14.2857	N+, N+S+	0.0309968
		N-S+	0	14	13	% of S+	0	82.3529	68.4211	S+, N-S+	0.0598979
		N+S-	54	30	36	% of N+	87.0968	90.9091	85.7143	N+S+, N+S-	0.0282586
	d8	N+	338	554	388
		S+	24	74	28
		N+S+	20	50	14	% of N+	5.91716	9.02527	3.60825	N+, N+S+	0.00383578
		N-S+	4	24	14	% of S+	16.6667	32.4324	50	S+, N-S+	0.175866
		N+S-	318	504	374	% of N+	94.0828	90.9747	96.3918	N+S+, N+S-	0.0146397
	d10	N+	388	776	620
		S+	44	162	144
		N+S+	28	120	106	% of N+	7.21649	15.4639	17.0968	N+, N+S+	0.0118255
		N-S+	16	42	38	% of S+	36.3636	25.9259	26.3889	S+, N-S+	0.0873718
		N+S-	360	656	514	% of N+	92.7835	84.5361	82.9032	N+S+, N+S-	0.0190279
Figure 1Dii							RepA	RepB	RepC		T-test
	d4	N+	0	2	0
		S+	0	0	3
		N+S+	0	0	0	% of N+	NA	0	NA	N+, N+S+	0.42265
		N-S+	0	0	3	% of S+	NA	#DIV/0!	100	S+, N-S+	NA
		N+S-	0	2	0	% of N+	NA	100	NA	N+S+, N+S-	0.42265
	d6	N+	114	90	15
		S+	10	16	14
		N+S+	8	8	9	% of N+	7.01754	8.88889	60	N+, N+S+	0.165064
		N-S+	2	8	5	% of S+	20	50	35.7143	S+, N-S+	0.00159617
		N+S-	106	82	6	% of N+	92.9825	91.1111	40	N+S+, N+S-	0.205679
	d8	N+	244	150	66
		S+	120	84	42
		N+S+	88	50	41	% of N+	36.0656	33.3333	62.1212	N+, N+S+	0.154228
		N-S+	32	34	1	% of S+	26.6667	40.4762	2.38095	S+, N-S+	0.0749883
		N+S-	156	100	25	% of N+	63.9344	66.6667	37.8788	N+S+, N+S-	0.314494
	d10	N+	248	232	105
		S+	126	134	64
		N+S+	104	98	70	% of N+	41.9355	42.2414	66.6667	N+, N+S+	0.0879448
		N-S+	22	36	-6	% of S+	17.4603	26.8657	-9.375	S+, N-S+	0.0231895
		N+S-	144	134	35	% of N+	58.0645	57.7586	33.3333	N+S+, N+S-	0.631259
Figure 1Diii							RepA	RepB	RepC		T-test
	d4	N+	0	7	13
		S+	0	67	57
		N+S+	0	2	10	% of N+	NA	28.5714	76.9231	N+, N+S+	0.207882
		N-S+	0	65	47	% of S+	NA	97.0149	82.4561	S+, N-S+	0.320634
		N+S-	0	5	3	% of N+	NA	71.4286	23.0769	N+S+, N+S-	0.696761
	d6	N+	164	728	780
		S+	50	942	1054
		N+S+	112	684	712	% of N+	68.2927	93.956	91.2821	N+, N+S+	0.0162518
		N-S+	-62	258	342	% of S+	-124	27.3885	32.4478	S+, N-S+	0.123794
		N+S-	52	44	68	% of N+	31.7073	6.04396	8.71795	N+S+, N+S-	0.147214
	d8	N+	652	1502	1280
		S+	362	1576	1242
		N+S+	496	1482	1168	% of N+	76.0736	98.6684	91.25	N+, N+S+	0.816058
		N-S+	-134	94	74	% of S+	-37.0166	5.96447	5.95813	S+, N-S+	0.0469005
		N+S-	156	20	112	% of N+	23.9264	1.33156	8.75	N+S+, N+S-	0.100908
	d10	N+	908	998	800
		S+	832	1300	1056
		N+S+	890	974	776	% of N+	98.0176	97.5952	97	N+, N+S+	0.799471
		N-S+	-58	326	280	% of S+	-6.97115	25.0769	26.5152	S+, N-S+	0.00833848
		N+S-	18	24	24	% of N+	1.98238	2.40481	3	N+S+, N+S-	0.00447422
Figure 1E
			RepA	RepB
		N+S+ E+	34	51
		N+S+ E-	6	4
		N+E+ S+	41	57
		N+E+ S-	35	76
Primary data associated with Figure 2
	E= E-cadherin, Nc= N-cadherin
		d7					d11
		E-Nc-	E+Nc-	E-Nc+	E+Nc+		E-Nc-	E+Nc-	E-Nc+	E+Nc+
	Rep A	27	17	49	0	Rep A	239	44	16	0
	Rep B	54	60	80	6	Rep B	96	89	11	2
	Total	81	77	129	6	Total	335	133	27	2
	Percentage	27.6451	26.2799	44.0273	2.04778	Percentage	67.4044	26.7606	5.4326	0.402414
		293	293	293	293		497	497	497	497
Primary data associated with Figure 3
	N+= Nanog , E+= E-cadherin, D+=Dppa4
Figure 3F
	d11 Fix		d11 Removal
	Rep A	Rep B	Rep A	Rep B
N+E+	111	85	105	114
N+E+D+	19	0	68	50
N+E+D-	0	0	0	0
	N+= Nanog , E+= E-cadherin
Figure 3F		RepA	RepB	RepC	RepD		RepA	RepB	RepC	RepD	T-test
d4	N+	0	12	1	0
	E+	0	16	1	0
	N+E+	0	12	1	0	% of N+	NA	100	100	NA	N+, N+E+	NA
	N-E+	0	4	0	0	% of E+	NA	25	0	NA	E+, N-E+	0.347724
	N+E-	0	0	0	0	% of N+	NA	0	0	NA	N+E+, N+E-	0.347724
d6	N+	244	298	6	0
	E+	198	286	7	0
	N+E+	240	290	6	0	% of N+	98.3607	97.3154	100	NA	N+, N+E+	0.21517
	N-E+	-42	-4	1	0	% of E+	-21.2121	-1.3986	14.2857	NA	E+, N-E+	0.177425
	N+E-	4	8	0	0	% of N+	1.63934	2.68456	0	NA	N+E+, N+E-	0.176944
d8	N+	182	236	10	12
	E+	178	260	10	16
	N+E+	178	234	10	12	% of N+	97.8022	99.1525	100	100	N+, N+E+	0.21517
	N-E+	0	26	0	4	% of E+	0	10	0	25	E+, N-E+	0.155329
	N+E-	4	2	0	0	% of N+	2.1978	0.847458	0	0	N+E+, N+E-	0.15548
d10	N+	206	288	131	138
	E+	302	374	142	149
	N+E+	206	288	122	130	% of N+	100	100	93.1298	94.2029	N+, N+E+	0.18279
	N-E+	96	86	20	19	% of E+	31.7881	22.9947	14.0845	12.7517	E+, N-E+	0.0171038
	N+E-	0	0	9	8	% of N+	0	0	6.87023	5.7971	N+E+, N+E-	0.0211776
Primary data associated with Figure 4
	N+= Nanog , E+= E-cadherin						N+= Nanog , E+= E-cadherin
Figure 1Ci			RepA	RepB	RepC	Figure 4B		RepA	RepB	RepC	T-test
	d4	N+E+	0	4	0		N+E+	0	12	1	0.355497
	d6	N+E+	0	2	5		N+E+	240	290	6	0.185319
	d8	N+E+	92	30	14		N+E+	178	234	10	0.254267
	d10	N+E+	238	220	112		N+E+	206	288	122	0.649701
						Figure 4C
Figure 1Cii			RepA	RepB	RepC			RepA	RepB	RepC
	d4	N+E+	0	1	1		N+E+	0	1	0	0.42265
	d6	N+E+	58	58	30		N+E+	14	41	80	0.907609
	d8	N+E+	110	186	68		N+E+	19	144	158	0.815698
	d10	N+E+	106	262	204		N+E+	20	136	236	0.333278
Figure 1Ciii						Figure 4D		RepA	RepB	RepC
	d4	N+E+	0	14	26		N+E+	0	33	97	0.293024
	d6	N+E+	108	790	666		N+E+	88	232	290	0.181777
	d8	N+E+	674	976	1504		N+E+	328	440	382	0.103577
	d10	N+E+	882	738	1208		N+E+	996	378	442	0.31585
	N+= Nanog , E+= E-cadherin
Figure 4B		RepA	RepB	RepC		RepA	RepB	RepC
d4	N+	0	12	1
	E+	0	16	1
	N+E+	0	12	1	% of N+	NA	100	100
	N-E+	0	4	0	% of E+	NA	25	0
	N+E-	0	0	0	% of N+	NA	0	0
d6	N+	244	298	6
	E+	198	286	7
	N+E+	240	290	6	% of N+	98.3607	97.3154	100
	N-E+	-42	-4	1	% of E+	-21.2121	-1.3986	14.2857
	N+E-	4	8	0	% of N+	1.63934	2.68456	0
d8	N+	182	236	10
	E+	178	260	10
	N+E+	178	234	10	% of N+	97.8022	99.1525	100
	N-E+	0	26	0	% of E+	0	10	0
	N+E-	4	2	0	% of N+	2.1978	0.847458	0
d10	N+	206	288	131
	E+	302	374	142
	N+E+	206	288	122	% of N+	100	100	93.1298
	N-E+	96	86	20	% of E+	31.7881	22.9947	14.0845
	N+E-	0	0	9	% of N+	0	0	6.87023
Figure 4C
		RepA	RepB	RepC		RepA	RepB	RepC
d4	N+	0	1	0
	E+	34	63	93
	N+E+	0	1	0	% of N+	NA	100	#DIV/0!
	N-E+	34	62	93	% of E+	100	98.4127	100
	N+E-	0	0	0	% of N+	NA	0	#DIV/0!
d6	N+	15	41	80
	E+	72	102	147
	N+E+	14	41	80	% of N+	93.3333	100	100
	N-E+	58	61	67	% of E+	80.5556	59.8039	45.5782
	N+E-	1	0	0	% of N+	6.66667	0	0
d8	N+	19	146	166
	E+	148	210	214
	N+E+	19	144	158	% of N+	100	98.6301	95.1807
	N-E+	129	66	56	% of E+	87.1622	31.4286	26.1682
	N+E-	0	2	8	% of N+	0	1.36986	4.81928
d10	N+	20	162	238
	E+	70	396	408
	N+E+	20	136	236	% of N+	100	83.9506	99.1597
	N-E+	50	260	172	% of E+	71.4286	65.6566	42.1569
	N+E-	0	26	2	% of N+	0	16.0494	0.840336
Figure 4D
		RepA	RepB	RepC		RepA	RepB	RepC
d4	N+	0	33	97
	E+	0	46	113
	N+E+	0	33	97	% of N+	NA	100	100
	N-E+	0	13	16	% of E+	NA	28.2609	14.1593
	N+E-	0	0	0	% of N+	NA	0	0
d6	N+	88	232	290
	E+	88	262	314
	N+E+	88	232	290	% of N+	100	100	100
	N-E+	0	30	24	% of E+	0	11.4504	7.64331
	N+E-	0	0	0	% of N+	0	0	0
d8	N+	328	440	382
	E+	364	526	448
	N+E+	328	440	382	% of N+	100	100	100
	N-E+	36	86	66	% of E+	9.89011	16.3498	14.7321
	N+E-	0	0	0	% of N+	0	0	0
d10	N+	996	378	442
	E+	708	642	774
	N+E+	996	378	442	% of N+	100	100	100
	N-E+	-288	264	332	% of E+	-40.678	41.1215	42.8941
	N+E-	0	0	0	% of N+	0	0	0
Figure 4E
		DMSO
		RepA	RepB	RepC		RepA	RepB	RepC		T-test
	N+	127	104	73					N+ dmso, N+sgc	0.184912
	E+	104	132	105					E+ dmso, E+sgc	0.125727
	N+ E+	74	82	44	% of N+	58.2677	78.8462	60.274	N+E+ dmso, N+E+sgc	0.0933222
	N-E+	30	50	61	% of E+	28.8462	37.8788	58.0952	N-E+ dmso, N-E+sgc	0.82636
	N+E-	53	22	29	% of N+	41.7323	21.1538	39.726	N+E- dmso, N+E-sgc	0.063133
		SGC
		RepA	RepB	RepC		RepA	RepB	RepC
	N+	196	244	85
	E+	214	308	137
	N+ E+	195	244	85	% of N+	99.4898	100	100
	N-E+	19	64	52	% of E+	8.8785	20.7792	37.9562
	N+E-	1	0	0	% of N+	0.510204	0	0
Figure 4G
		RepA		RepB
		Ctrl	Sox2	Ctrl	Sox2
	N+	1048	1136	1280	1500
	N+E+	888	784	1192	1452
